# Supplementary material for: Atomic insight into the structural transformation and anionic/cationic redox reactions of VS2 nanosheets in sodium-ion batteries
Source: Royal Society of Chemistry journal article supplement (doi:10.1039/c8ta05396k), 2018-01-01
Supplement: c8ta05396k1.pdf [file c8ta05396k1.pdf]

## Supporting information

### **Atomic Insight into the Structural Transformation and Anionic/Cationic Redox Reactions of VS<sub>2</sub> Nanosheets in Sodium-Ion Batteries**

*Dashuai Wang<sup>a</sup>, Yingying Zhao<sup>a</sup>, Ruqian Lian<sup>a</sup>, Di Yang<sup>a</sup>, Dong Zhang<sup>a</sup>, Xing Meng<sup>a</sup>,  
Yanhui Liu<sup>b</sup>, Yingjin Wei<sup>a,\*</sup> and Gang Chen<sup>a,\*</sup>*

<sup>a</sup> Key Laboratory of Physics and Technology for Advanced Batteries (Ministry of Education), Jilin University, Changchun 130012, China.

<sup>b</sup> Department of Physics, College of Science, Yanbian University, Yanji 133002, China.

\*Corresponding author: yjwei@jlu.edu.cn (Y. J. Wei); gchen@jlu.edu.cn (G. Chen)

Tel & Fax: 86-431-85155126

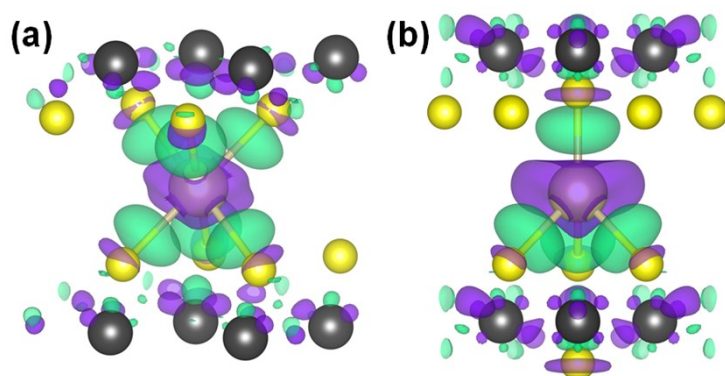

**Fig. S1.** Charge density difference of VS<sub>2</sub> with an isolated Na in an octahedral site (a) and in a tetrahedral site (b). Green, accumulation of electron density and blue, depletion of electron density.

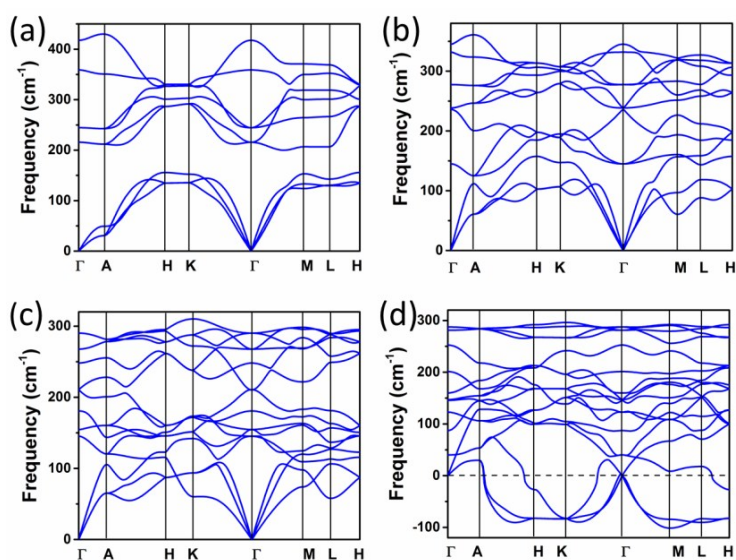

**Fig. S2.** Phonon band dispersions of VS<sub>2</sub> (a), Na<sub>1.0</sub>VS<sub>2</sub> (b), Na<sub>2.0</sub>VS<sub>2</sub> (c), and Na<sub>3.0</sub>VS<sub>2</sub> (d).

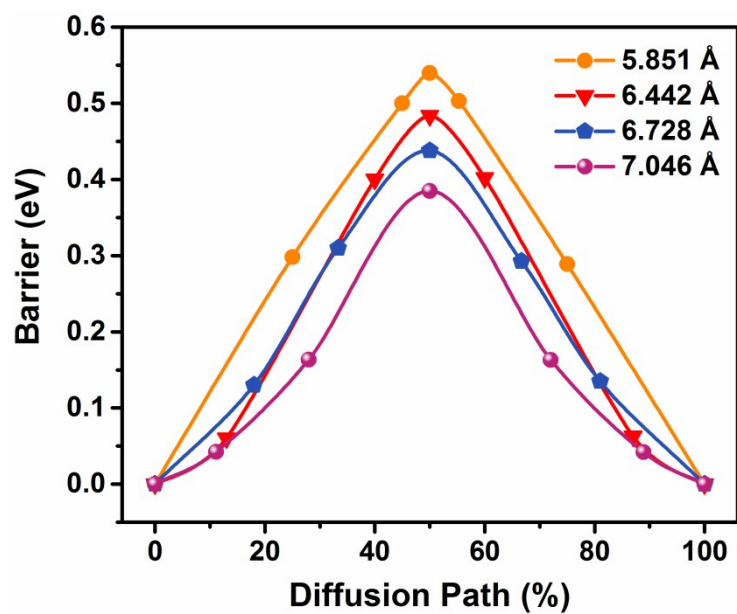

**Fig. S3.** Calculated diffusion barriers of Na in  $\text{VS}_2$  along the  $\text{O} \rightarrow \text{O}'$  pathway with different interlayer spacing.

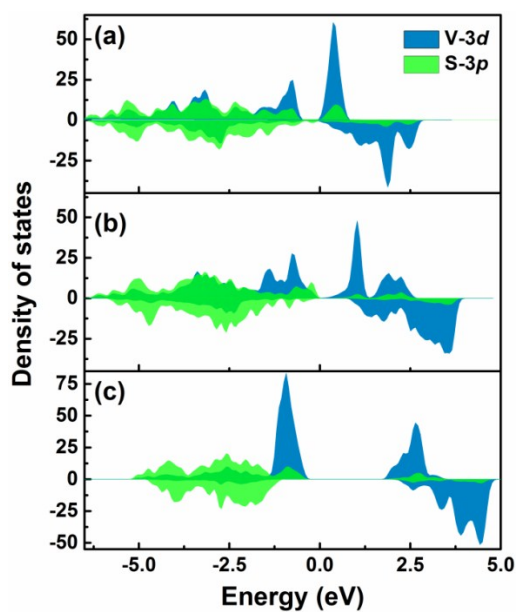

**Fig. S4.** Partial density of states (PDOS) of V-3d and S-3p in  $\text{VS}_2$  (a),  $\text{Na}_{1.0}\text{VS}_2$  (b) and  $\text{Na}_{2.0}\text{VS}_2$  (c).
